CORRECTION

# Correction: Human Cardiac Progenitor Spheroids Exhibit Enhanced Engraftment Potential

Francesca Oltolina, Andrea Zamperone, Donato Colangelo, Luca Gregoletto, Simone Reano, Stefano Pietronave, Simone Merlin, Maria Talmon, Eugenio Novelli, Marco Diena, Carmine Nicoletti, Antonio Musarò, Nicoletta Filigheddu, Antonia Follenzi, Maria Prat

The fourteenth and fifteenth authors, Antonia Follenzi and Maria Prat, should be noted as contributing equally to this work.

In the Author Contributions section, Antonia Follenzi (AF) should be listed as one of the persons who conceived and designed the experiments, contributed reagents/materials/analysis tools, and wrote the paper in addition to analyzed the data.

## Reference

1. Oltolina F, Zamperone A, Colangelo D, Gregoletto L, Reano S, Pietronave S, et al. (2015) Human Cardiac Progenitor Spheroids Exhibit Enhanced Engraftment Potential. PLoS ONE 10(9): e0137999. doi:[10.1371/journal.pone.0137999](https://doi.org/10.1371/journal.pone.0137999) PMID: [26375957](https://pubmed.ncbi.nlm.nih.gov/26375957/)

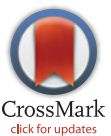

## OPEN ACCESS

**Citation:** Oltolina F, Zamperone A, Colangelo D, Gregoletto L, Reano S, Pietronave S, et al. (2015) Correction: Human Cardiac Progenitor Spheroids Exhibit Enhanced Engraftment Potential. PLoS ONE 10(10): e0141632. doi:[10.1371/journal.pone.0141632](https://doi.org/10.1371/journal.pone.0141632)

**Published:** October 23, 2015

**Copyright:** © 2015 Oltolina et al. This is an open access article distributed under the terms of the [Creative Commons Attribution License](https://creativecommons.org/licenses/by/4.0/), which permits unrestricted use, distribution, and reproduction in any medium, provided the original author and source are credited.
